# Supplementary material for: Genetic alterations in main candidate genes during melanoma progression
Source: PubMed Central journal article supplement (PMC5823576; doi:10.18632/oncotarget.23989), 2018-01-03
Supplement: oncotarget-09-8531-s001.pdf [file oncotarget-09-8531-s001.pdf]

## Genetic alterations in main candidate genes during melanoma progression

### SUPPLEMENTARY MATERIALS

**Supplementary Table 1: Percentages of gene alterations in melanoma cell lines.** In bold, cases with gene amplification (according to the criteria reported in Materials and Methods). See Supplementary\_Table\_1.
